# Supplementary material for: H-Bonded complexes of adenine with Rebek imide receptors are stabilised by cation–π interactions and destabilised by stacking with perfluoroaromatics
Source: Royal Society of Chemistry journal article supplement (doi:10.1039/b314353h), 2004-01-01
Supplement: b314353h.doc [file b314353h.doc]

**Electronic Supplementary Information**

## H-bonded complexes of adenine with *Rebek* imide receptors are stabilised by cation-*π* interactions and destabilised by stacking with perfluoroaromatics †

Raffaella Faraoni,*a* Ronald K. Castellano,*a,b* Volker Gramlich*c* and François Diederich*a**

*a Laboratorium für Organische Chemie, ETH-Hönggerberg, CH-8093 Zürich, Switzerland.*

*E-mail:* [*diederich@org.chem.ethz.ch*](mailto:diederich@org.chem.ethz.ch)

*b*Current address: *Department of Chemistry, University of Florida, Gainesville, FL 32611-7200, U.S.A.*

*c**Laboratorium für Kristallographie, ETH-Zentrum, Sonneggstrasse 5, CH-8092 Zürich, Switzerland.*

I. **Synthesis ESI**

**Table ESI 2** Synthesis of receptors **1a,b,d** by acylation with **4**


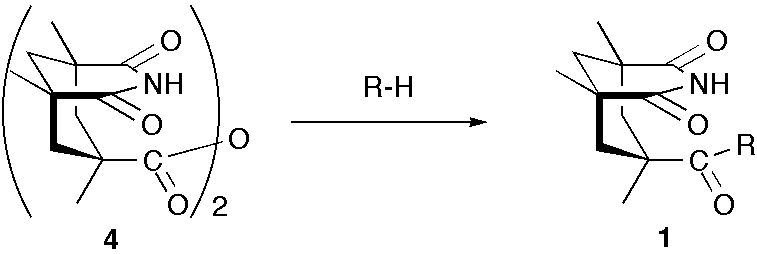


| Receptor | R | Yield (%)a |
| --- | --- | --- |
| **1a** | 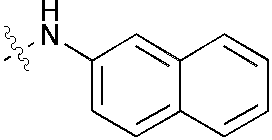 | 35% |
| **1b** | 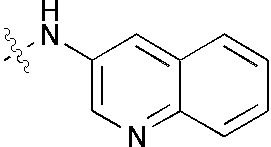 | 32% |
| **1d** | 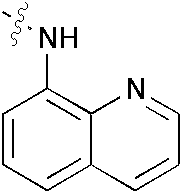 | 60% |

*a* Isolated yields after crystallisation or flash chromatography on silica gel.

**Table ESI 1** Synthesis of *Rebek* imide and ester receptors **1a**-**i**


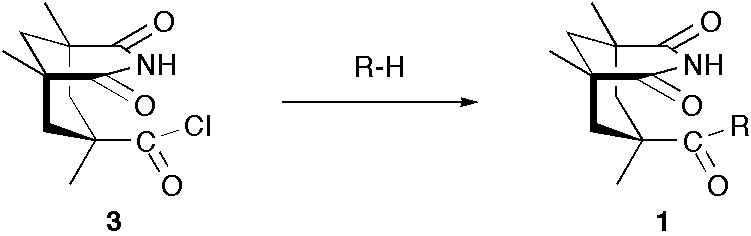


| Receptor | R | Yield (%)a |
| --- | --- | --- |
| **1a** | 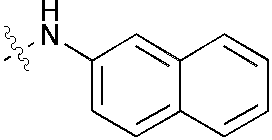 | 69% |
| **1b** | 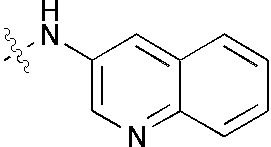 | 61% |
| **1d** | 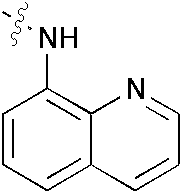 | 55% |
| **1e** | 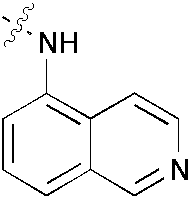 | 42% |
| **1f** | 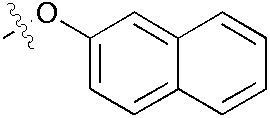 | 72% |
| **1g** | 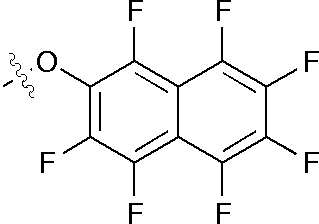 | 83% |
| **1h** | 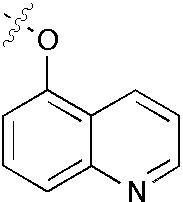 | 73% |
| **1i** | 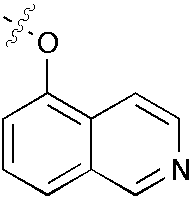 | 44% |

*a* Isolated yields after crystallisation or flash chromatography on silica gel.

Synthesis of receptors **1a**-**e**:

A solution of **3** (200 mg, 0.78 mmol) in CHCl3 (1.1 ml) was added at r.t. to a stirred solution of the primary amine (0.78 mmol) and DMAP (19 mg, 0.15 mmol) in dry pyridine (6 ml). The mixture was heated to reflux under N2 for 8 h. After concentration *in vacuo* the residue was taken up in CHCl3, washed with 10% aqueous HCl, saturated aqueous NaHCO3 solution and saturated aqueous NaCl solution. The organic phase was dried (Na2SO4) and concentrated to give a light-yellow solid. The crude product was either purified by flash chromatography (SiO2; AcOEt/CH2Cl2 2:8) or recrystallised from CH2Cl2/hexane.

Synthesis of receptors **1f**-**i**:

A solution of the aromatic alcohol (61 mg, 0.43 mmol) in dry THF (10 ml) was cooled to 0 °C and then treated with NaH (23 mg, 0.58 mmol 60% oil dispersion). The solution was stirred for 30 min at 0 °C prior to the dropwise addition of **3** (100 mg, 0.39 mmol) in dry THF (10 ml). After complete addition, the solution was stirred for 3 h at r.t. before H2O (1 ml) was added. The solvent was removed *in vacuo* and the residue was partitioned between H2O and CHCl3. The organic phase was separated and the aqueous phase was extracted with CHCl3. The combined organic phases were washed with saturated aqueous NaHCO3 solution and saturated aqueous NaCl solution. The organic phase was dried (Na2SO4) and concentrated to give a yellow-white solid. The crude product was recrystalised from CH2Cl2/hexane or CHCl3/MeOH/hexane to afford a white solid.

Synthesis of **4**:

A solution of **3** (210 mg, 0.84 mmol) in CH2Cl2 (2 ml) was added at r.t. to a stirred solution of Kemp’s imide acid (200 mg, 0.84 mmol) and DMAP (21 mg, 0.17 mmol) in dry (0.23 ml) Et3N. The mixture was heated to reflux under N2 overnight. CHCl3 was added and the mixture was washed with 0.5 m HCl and saturated aqueous NaCl solution, then dried (Na2SO4). Concentration *in vacuo* gave a white solid that was recrystallised from MeOH and dried under high vacuum to give **4** (289 mg, 75%) as a bright-white solid.

Synthesis of amides **1a-d**:

Kemp’s anhydride **4** (70 mg, 0.15 mmol) and primary arylamine (0.15 mmol) were refluxed in DMF for 48 h. The mixture was cooled to r.t. and concentrated to dryness. The crude product was purified by flash chromatography (**1a**: SiO2; MeOH/CH2Cl2 1:99; **1b**: SiO2; AcOEt/CH2Cl2 2:1). Recrystallisation from MeOH gave **1d**.

Synthesis of **1c**:

In an oven-dried sealed tube, **1b** (120 mg, 0.329 mmol) was added and suspended in MeI (1,2 ml) under N2. The mixture was heated to 120 °C and stirred for one week. The mixture was cooled to r.t. and MeI was evaporated under a flow of N2. The residue was recrystallised from MeOH/Et2O to give **1c** (145 mg, 87%) as a bright-yellow solid. M.p. ≥ 291 °C (dec.); FT-IR (neat): 3581*m*, 3499*m*, 3209*m*, 3049*m*, 2961*m*, 2868*m*, 1721*s*, 1695*s*, 1630*m*, 1514*s*, 1429*m*, 1380*m*, 1207*s*, 1178*s*, 897*m*, 765*m*. 1H-NMR (300 MHz, CDCl3/MeOH 2:1) : 9.52 (*s*, 1H); 8.99 (*s*, 1H); 8.13-8.06 (*m*, 2H); 7.95 (*t*, *J* = 7.5 and 8.7, 1H); 7.77 (*t*, *J* = 7.5 and 7.8, 1H); 4.49 (*s*, 3H); 2.69 (*d*, *J*= 15.0, 2H); 1.84 (*d*, *J* = 13.8, 1H); 1.32-1.05 (*m*, 12H). 13C-NMR (75.41 MHz, CDCl3/MeOH 2:1) : 177.19; 175.24; 144.19; 135.90; 135.71; 134.66; 133.14; 130.51; 130.16; 129.76; 117.93; 45.86; 44.08; 43.64; 43.28; 39.98; 30.05; 23.92.

HR-FT-ICR-MALDI-MS (DHB) *m/z* 380.1974, calc. for C22H26N3O3+: 380.1974.

II. **Binding Studies ESI**

Determination of the association constants *K*a and the dimerisation constants *K*d

# 1H-NMR titrations and dilution experiments were performed at 295 K on a Varian Gemini 300 Spectrometer (300 MHz) in CDCl3 (stored over 4 Å molecular sieves) or in (CDCl2)2 purchased from Glaser, Basel. The receptor concentration (1a-i) was kept constant at 5 mm and a solution of 2 (50 mm) was added in increments by syringe into the NMR tube. The change in chemical shift of the imide N-H proton was recorded after each of 12-14 additions. Binding isotherms were created using Associate v. 1.610a or the *NMRTit HG HH GG* software10b on an Apple Macintosh computer. Values reported are the average of 2-3 independent runs. Uncertainty listed in *K*a is one standard deviation from duplicate or triplicate runs. Dilution experiments were carried out with a solution of 1a-i (30-50 mm), which was progressively diluted with CDCl3 or (CDCl2)2. The change in chemical shift of the imide N-H proton was recorded after each of 8-9 CDCl3 or (CDCl2)2 additions. When the change in chemical shift was minimal (< 0.5 ppm) over a large range of concentrations it was concluded that the self-association was negligible. Dilution curves and *K*d values were obtained using the *NMRDil Dimer* software10b on an Apple Macintosh computer. Values reported are the average of 2-3 independent runs. Uncertainty listed in *K*d is one standarddeviationfrom duplicate or triplicate runs.

# Determination of thermodynamic parameters by *van’t Hoff* analysis

# *Van’t Hoff* plots were generated by measuring the chemical shift response of the receptor imide N-H proton to temperature given a fixed concentration of receptor 1a-i (5-10 mm) and 2 (20 mm). The assumption of a temperature-independent chemical shift for the fully complexed imide N-H proton was made. The initial solution concentrations were chosen such that 20-80% of the saturation curve was sampled. Samples were equilibrated for 30-45 minutes initially (258 K), for 10-15 minutes between 258-303 K, and for 5 minutes thereafter until the maximum temperature was obtained (323K).

The *K*avalues were calculated as follows. *K*a = ([host•guest]/[host][guest]) where [host•guest] **=** ([**1a-i**]tot)(**obs-**r)/(****1a-i•2**-**r),where [**1a-i**]tot= the total concentration of **1a-i** in solution, **obs = observed chemical shift, **r = chemical shift of the imide N-H group of **1a-i**, ****1a-i•2** = chemical shift of the N-H group of **1a-i** in the **1a-i•2** complex (estimated on the basis of NMR titration data). Values reported are the average of 2-3 independent runs.

### Determination of the binding stoichiometry by Job plot analysis

The 1:1 binding stoichiometry of the **1a-i•2** complexes was confirmed as follows. Two stock solutions were prepared; solution A: 5 mm of **1** in CDCl3 or CD2Cl4. Solution B: 5 mm of **2** in CDCl3 or CD2Cl4. Ten 5-mm NMR tubes were filled with solutions A and B in the following volume ratios: 50:450, 100:400, 150:350, 200:300, 250:250, 300:200, 350:150, 400:100, 450:50, and 500:0 **L. 1H-NMR spectra were recorded at 300 MHz for each mixture. The concentration of the **1a-i•2** complexes was estimated as reported above. The experiments were repeated 2-3 times to ensure accuracy.

**Table ESI 3** Dimerisation

constants *K*d of receptors **1a**-**i**a

a Self-association of **1d** was

| Receptor | *K*d [m-1] |
| --- | --- |
| **1a** | 5.5  1.2 |
| **1b** | 130.5  39.0 |
| **1b**b | 30.0  8.7 |
| **1c**b | 11.8  2.9 |
| **1e** | 12.4  3.4 |
| **1f** | 4.4  1.4 |
| **1g** | 2.0  0.4 |
| **1h** | 4.1  0.4 |
| **1i**b | 3.9  1.1 |

negligible. b Measured in (CDCl2)2.

**Figure ESI 1** 1H-NMR titration to determine the stability of complex **1c•2** at295 Kin (CDCl2)2.


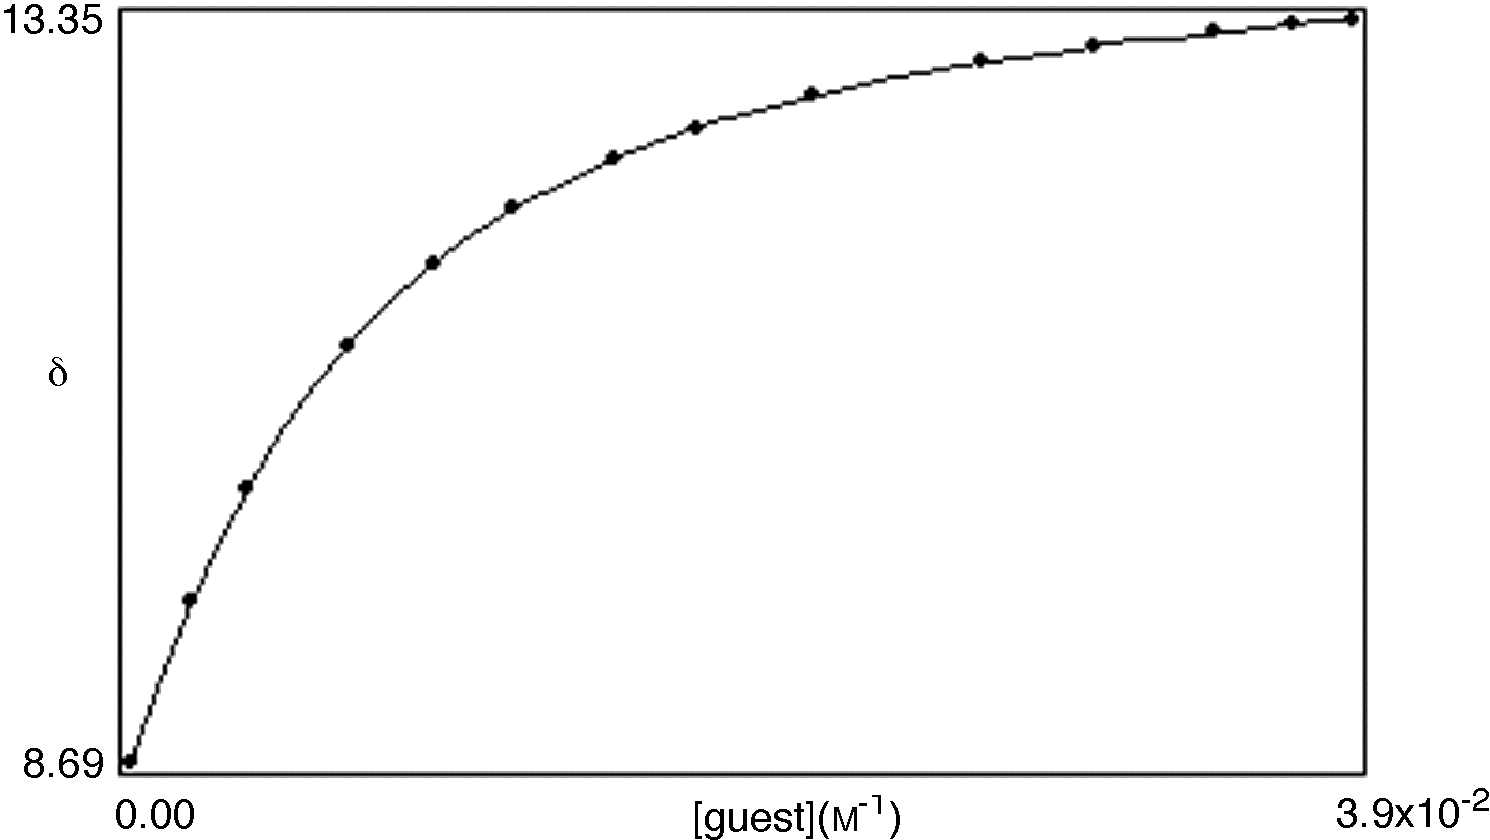


*K*a= 221m-1, [**1c**] = 5mm

**bound = 14.246 [**2**] = 50mm

**dimer fix = 9.653

**dimer dil = 12.100

ss of residuals = 2.58035724983•10-3

R factor = 0.303%

Min % bound = 1%

Max % bound = 84%

**Figure ESI 2** Dilution curve of **1c** in (CDCl2)2.


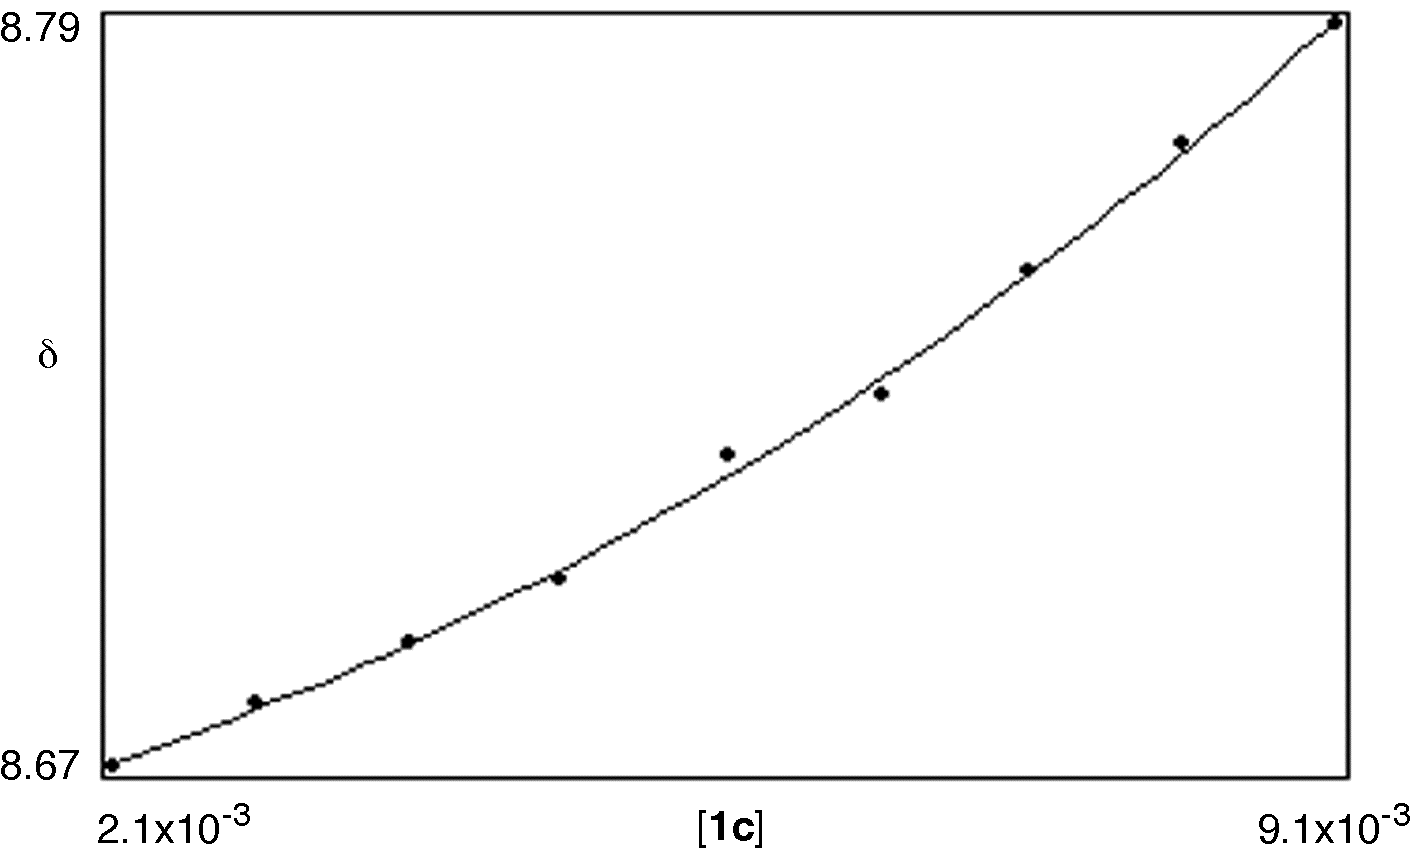


*K*d = 13.7m-1

**bound = 9.621

**free = 8.619

ss of residuals = 2.27090404223•10-5

R factor = 1.158%

Min bound = 5%

Max bound = 17%

**Figure ESI 3** *Van’t Hoff* plot to determine the temperature dependence of the association between **1c** and **2** in (CDCl2)2.


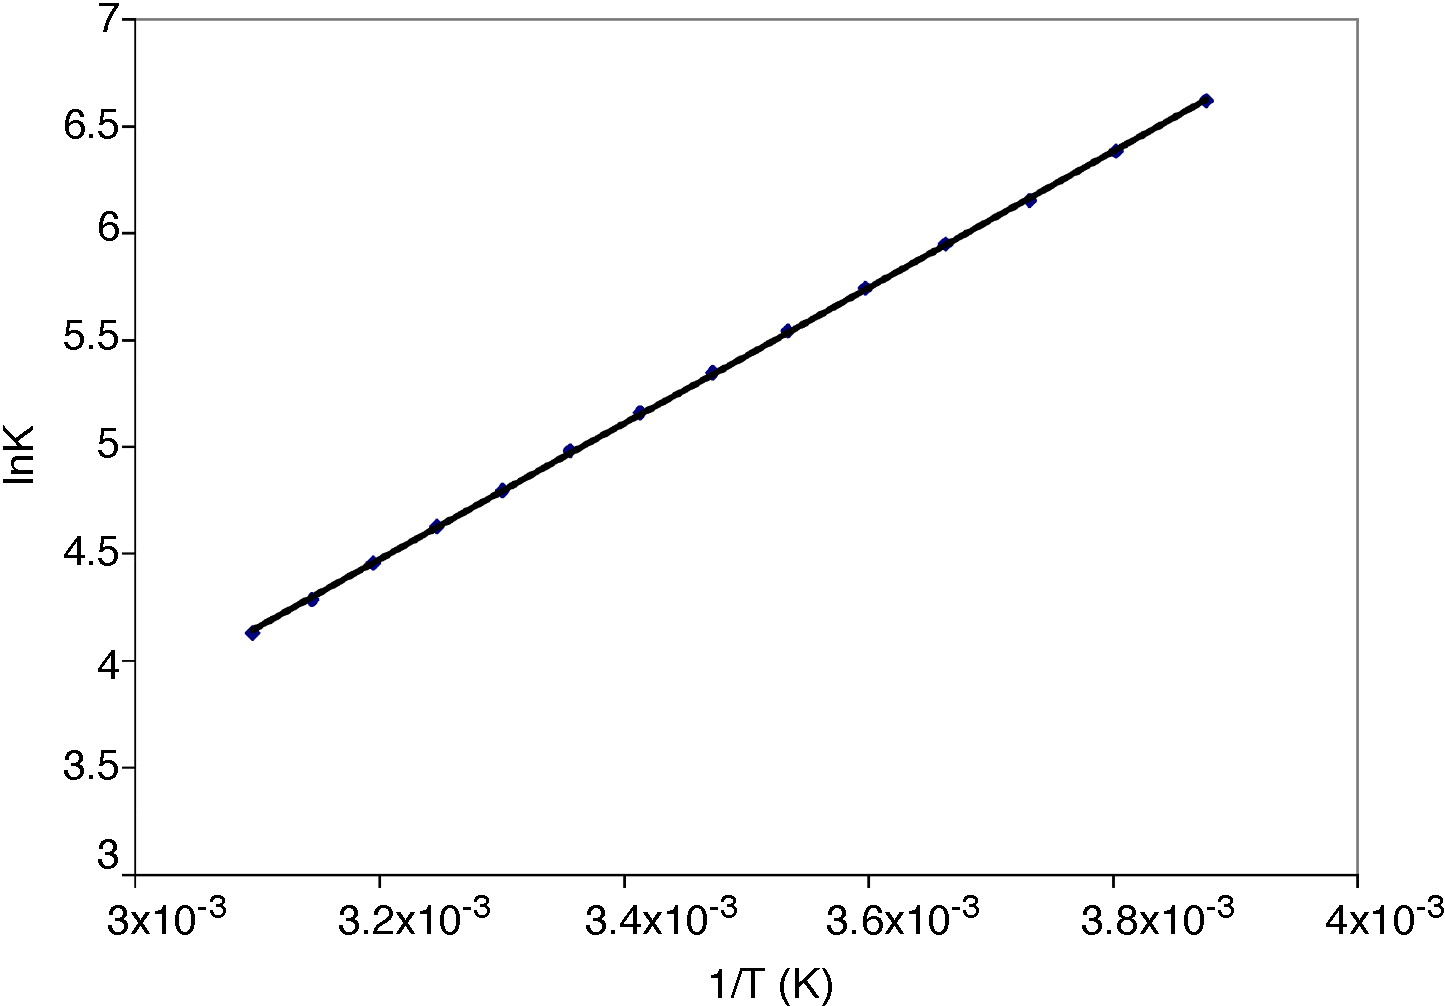


**Figure ESI 4** Job plot to prove the 1:1 binding stoichiometry of complex **1c•2** in (CDCl2)2.


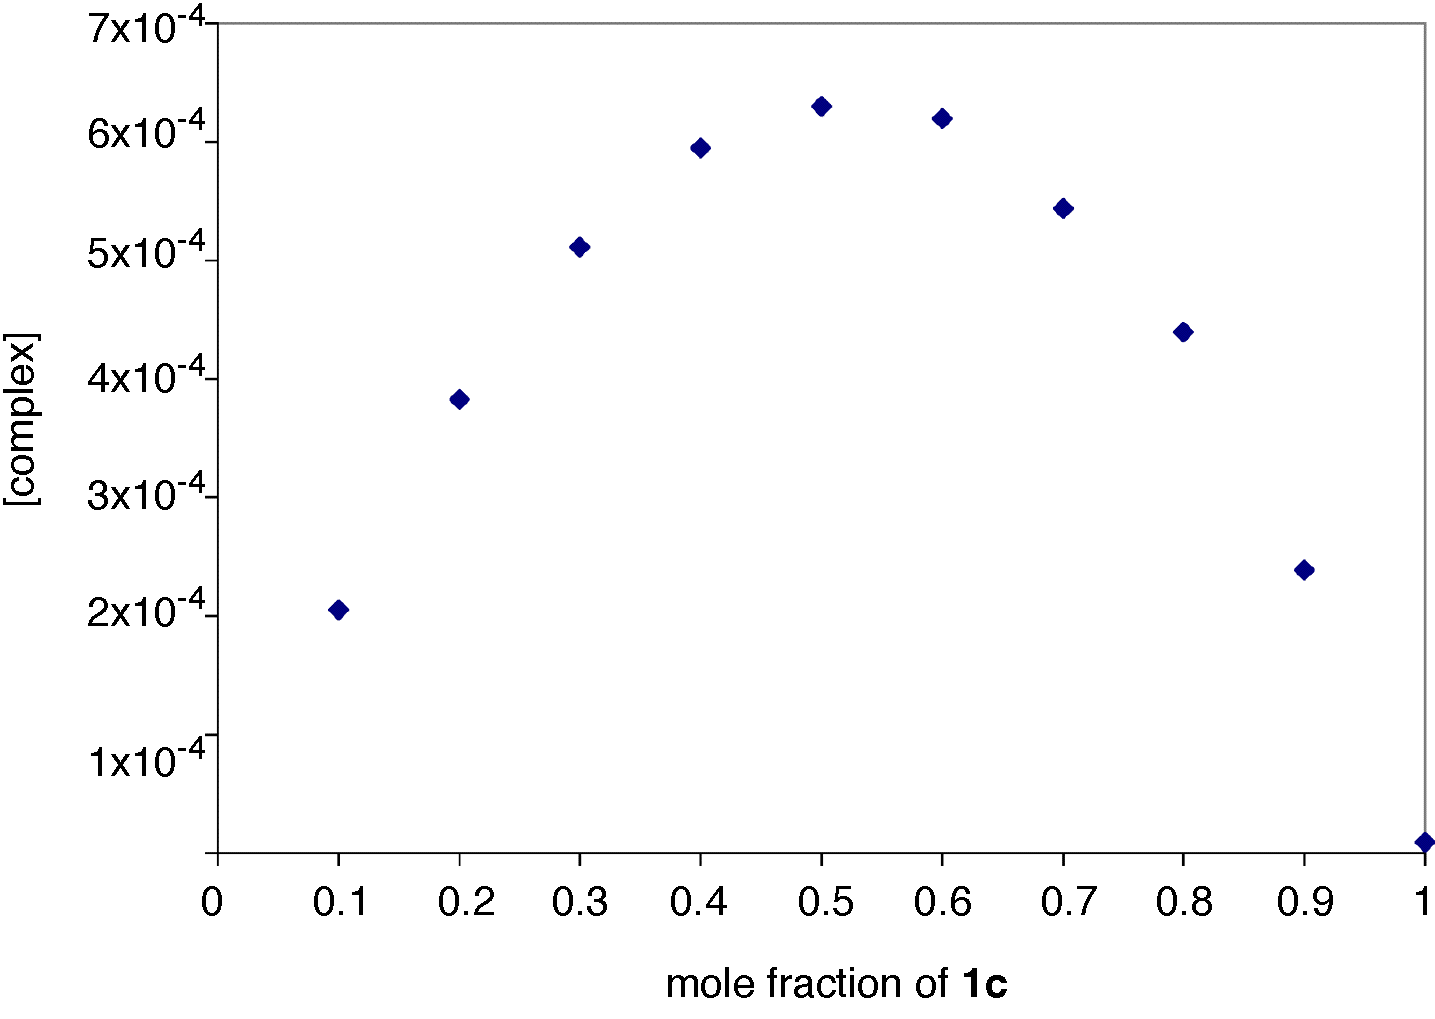


‡ *Crystal data*. Compound **4**, C24H32N2O7·CH2Cl2, *M* = 545.44, monoclinic, *a* = 15.631(8), *b* = 16.523(11), *c* = 11.782(6) Å, * =* 114.05(4)°, *V* = 2779(3) Å3, *T* = 293 K, space group C2/c, *Z* = 4, ** = 2.479 mm-1, 1278 reflections collected, *R1* = 0.0834based on *F* *I* > 2(*I*), *wR*2(*F*2) = 0.2555 (all data). Complex **1d****2**, C21H23N3O3·C7H9N5, *M* = 528.62, triclinic, *a* = 8.097(4), *b* = 9.350(5), *c* = 18.786(9) Å, ** = 76.19 (3), * =* 78.45(3), ** = 85.08(3)°, *V* = 1352.0(12) Å3, *T* = 293 K, space group P-1, *Z* = 2, ** = 0.715 mm-1, 2768 reflections collected, *R1* = 0.0436based on *F* *I* > 2(*I*), *wR*2(*F*2) = 0.1322 (all data). Complex **1c****2**, C22H26IN3O3·C7H9N5·H2O, *M* = 688.57, triclinic, *a* = 8.578(2), *b* = 12.724(3), *c* = 15.621(3) Å, ** = 109.03(3), * =* 95.46(3), ** = 102.40(3)°, *V* = 1548.8(6) Å3, *T* = 293 K, space group P-1, *Z* = 2, ** = 1.081 mm-1, 2457 reflections collected, *R1* = 0.0514based on *F* *I* > 2(*I*), *wR*2(*F*2) = 0.1251 (all data). The data of **4** and **1d****2** were collected on a PICKER-STOE diffractometer with CuK radiation (graphite monochromator ** = 1.54178) and for **1c****2** on a CAD4 diffractometer with MoK radiation (graphite monochromator ** = 0.71073). The structures were solved with the SHELXS program and refined by full matrix least-squares on F2 with the SHELXL program.
